# Supplementary material for: Impact of Preoperative Frailty on Outcomes in Patients Subjected to Emergency Laparotomy: A Prospective Study
Source: Research Square preprint supplement (doi:10.21203/rs.3.rs-5379794/v1), 2024-12-02
Supplement: Supplementary file 1 [file 2f19f61e2e2a38de912f4c56.docx]

Table 1. Descriptive Statistics

| Total number of patients | 251 |
| --- | --- |
| M:F ratio | 1.1 |
| Median age (IQRa) | 73 (65-81) |
| Centre  NEMCb  ETCHc | 199 (79.3)  52 (20.7) |
| CFSd grade  1  2  3  4  5  6  7  8  9 | 17 (6.8)  25 (10)  35 (13.9)  68 (27.1)  54 (21.5)  28 (11.2)  5 (2)  8 (3.2)  11 (4.4) |
| Patients requiring reoperations or other invasive interventions for complications. | 55 (21.9) |
| Median length of active care in days (IQR) | 8 (5-16) |
| Median length of active care + rehabilitation in days (iqr) | 10 (5-23) |
| 30-day mortality | 37 (14.7) |
| 90-day mortality | 61 (24.3) |
| 180-day mortality | 71 (28.3) |
| Place of living before operation  Independently or at home with relatives  Institutionalised at hospital or nursing home | 246 (98)  5 (2) |
| Place of living six months after operation  Independently or at home with relatives  Institutionalised at hospital or care home | 159 (94.6)  9 (5.4) |
| Median NELAe predicted 30-day mortality in % (IQR) | 7.7 (3.6-16.2) |

Numbers are n(%), unless otherwise specified. aIQR – interquartile range, bNEMC – North Estonia Medical Centre, cETCH – East Tallinn Central Hospital, dCFS – Clinical Frailty Scale, eNELA – National Emergency Laparotomy Audit.

Table 2. Postoperative Course by CFSa Grade

|  | CFS 1-3 | CFS 4 | CFS 5 | CFS 6-8 | CFS 9 |
| --- | --- | --- | --- | --- | --- |
| Number of patients (% of total) | 77 (30.7) | 68 (27.1) | 54 (21.5) | 41 (16.3) | 11 (4.4) |
| Patients requiring reoperations or other invasive interventions for complications. | 9 (11.7) | 16 (23.5) | 14 (25.9) | 12 (29.3) | 4 (36.4) |
| Patients admitted to the intensive care unit after operation | 15 (19.5) | 17 (25) | 18 (33.3) | 13 (31.7) | 2 (18.2) |
| Mean length of intensive care stay (standard deviation) | 1.5 (5.6) | 2.2 (5.8) | 2.6 (8.2) | 2.5 (5.6) | 0.3 (0.7) |
| Discharged home or to the care of relatives after active care | 63 (81.8) | 46 (67.6) | 23 (42.6) | 11 (26.8) | 1 (9.1) |
| Survived active care | 77 (100) | 65 (95.6) | 45 (83.3) | 27 (65.9) | 7 (63.6) |
| Median length of active care in days (IQRb) of surviving patients | 7 (5-13) | 8 (5-13) | 13 (7-18) | 9 (8-21) | 7 (5-11) |
| Median length of active care + aftercare in days (IQR) of surviving patients | 8 (5-15) | 9 (6-24) | 15 (8-28) | 20 (8-37) | 24 (15-32) |
| Surviving patients readmitted as emergency (any) | 11 (14.5) | 13 (20) | 7 (15.9) | 5 (19.2) | 2 (28.6) |
| Surviving patients readmitted as emergency (medical) | 4 (5.3) | 8 (12.3) | 5 (11.4) | 4 (15.4) | 2 (28.6) |
| Surviving patients readmitted as emergency (surgical) | 8 (10.5) | 6 (9.2) | 2 (4.5) | 1 (3.8) | 0 (0) |
| 30-day mortality  Total  Age 50-65  Age 65-80  Age 80+ | 0  0  0  0 | 6 (8.8)  0 (0)  1 (2.6)  5 (29.4) | 10 (18.5)  2 (28.6)  4 (15.4)  4 (19.0) | 16 (39)  2 (33.3)  8 (42.1)  6 (37.5) | 5 (45.5)  2 (50)  3 (42.9)  NA |
| 90-day mortality  Total  Age 50-65  Age 65-80  Age 80+ | 3 (3.9)  0 (0)  2 (5.4)  1 (10) | 9 (13.2)  2 (15.4)  2 (5.3)  5 (29.4) | 18 (33.3)  3 (42.9)  8 (30.8)  7 (33.3) | 23 (56.1)  2 (33.3)  11 (57.9)  10 (62.5) | 8 (72.7)  3 (75)  5 (71.4)  NA |
| 180-day mortality  Total  Age 50-65  Age 65-80  Age 80+ | 5 (6.5)  0 (0)  4 (10.8)  1 (10) | 10 (14.7)  3 (23.1)  2 (5.3)  5 (29.4) | 21 (38.9)  3 (42.9)  11 (42.3)  7 (33.3) | 25 (61.0)  2 (33.3)  12 (63.2)  11 (68.8) | 10 (90.9)  4 (100)  6 (85.7)  NA |

Numbers are n (% within specified category), unless otherwise specified. aCFS – Clinical Frailty Scale bIQR – Interquartile Range.

|  | CFSa < 5 | CFS ≥ 5 |
| --- | --- | --- |
| Number of patients at six months | 118 | 50 |
| Patients institutionalised preoperatively | 0 | 1 (2.0%) |
| Patients institutionalised at six months after operation | 2 (1.7%) | 7 (14.0%) |

Table 3. The Place of Living Preoperatively and Six Months after the Operation.

aCFS – Clinical Frailty Scale

Table 4. 90-day Mortality Rates in Our Cohort and in the Emergency Laparotomy and Frailty (ELF) Study. Parmar KL, Law J, Carter B, Hewitt J, Boyle JM, Casey P, et al. Frailty in Older Patients Undergoing Emergency Laparotomy: Results From the UK Observational Emergency Laparotomy and Frailty (ELF) Study. Ann Surg. 2021;273:709–18

| 90-day mortality (%) | CFSa 1-3 | CFS 4 | CFS 5 | CFS 6-7 |
| --- | --- | --- | --- | --- |
| Total (age 65 or more)  Our study  The ELF Study  Age 65-80  Our study  The ELF Study  Age 80+  Our study  The ELF Study | 6.4  12.2  5.4  12.0  10  11.2 | 12.7  27.8  5.3  25.2  29.4  30.5 | 31.9  27.8  30.8  24.6  33.3  25.5 | 60.0  42.9  57.9  49.1  62.5  41.9 |

aCFS – Clinical Frailty Scale

Table 5. 90-day Mortality Rates in Our Cohort and in New Zealand by Park *et al.* Park B, Vandal A, Sulistio E, Bhat S, Welsh F, Eglinton T, et al. Association between frailty, long-term mortality and functional outcomes for older adults undergoing emergency laparotomy. World J Surg. 2024;48:1111–22.

| 180-day mortality (%) | CFSa 1-3 | CFS 4 | CFS 5 | CFS 6-8 | CFS 9 |
| --- | --- | --- | --- | --- | --- |
| Total  Our study  Park *et al*  Age < 65  Our study  Park *et al*  Age 65-80  Our study  Park *et al*  Age 80+  Our study  Park *et al* | 6.5  7.8  0  7.9  10.8  7.0  10.0  9.4 | 14.7  23.4  23.1  14.8  5.3  26.8  29.4  24.1 | 38.9  29.3  42.9  33.3  42.3  35.3  33.3  23.8 | 61.0  37.5  33.3  40.0  63.2  26.7  68.8  46.2 | 90.9  33.3  100  NA  85.7  33.3  NA  NA |

aCFS – Clinical Frailty Scale
